# Supplementary material
Source: PubMed Central journal article supplement (PMC6278990)
Supplement: 2018_196113-Disclosures_and_Contributions.pdf [file 2018_196113-Disclosures_and_Contributions.pdf]

Haematologica  
HAEMATOL/2018/196113  
Version 3

Comprehensive molecular characterization of a heavy chain deposition  
disease case

Sébastien Bender, Maria Victoria Ayala, Vincent Javaugue, Amélie  
Bonaud, Michel Cogné, Guy Touchard, Arnaud Jaccard, Frank Bridoux,  
and Christophe Sirac

Disclosures: none

Contributions: SB designed, performed, analyzed experiments and wrote the manuscript. MVA, VJ and AB contributed equally to this work, they performed and analyzed data and drafted the manuscript. GT performed patient analysis and reviewed the manuscript. MC, AJ and FB critically reviewed the manuscript. CS supervised this research and wrote the manuscript.
